# Supplementary material for: Sweetsop-like α-Fe2O3@CoNi catalyst with superior peroxidase-like activity for sensitive and selective detection of hydroquinone
Source: Royal Society of Chemistry journal article supplement (doi:10.1039/d1ra03456a), 2021-01-01
Supplement: d1ra03456a1.pdf [file d1ra03456a1.pdf]

1

## Supplementary Information

2 **Sweetsop-like  $\alpha$ -Fe<sub>2</sub>O<sub>3</sub>@CoNi catalyst with superior peroxidase-like activity**  
3 **for sensitive and selective detection of hydroquinone**

4 Min Feng,<sup>a</sup> Shaohua Wen,<sup>a</sup> Xiaofang Chen,<sup>a</sup> Die Deng,<sup>a</sup> Xiupei Yang,<sup>\*a</sup> and Run Zhang<sup>\*b</sup>

5

6 <sup>a</sup> *College of Chemistry and Chemical Engineering, Chemical Synthesis and Pollution Control*  
7 *Key Laboratory of Sichuan Province, China West Normal University, Nanchong 637000, China*

8 <sup>b</sup> *Australian Institute for Bioengineering and Nanotechnology, The University of Queensland,*  
9 *Brisbane, Queensland 4072, Australia*

10

11 \*Corresponding author at: College of Chemistry and Chemical Engineering, China West  
12 Normal University, Nanchong 637000, China.

13 mail addresses: xiupeiyang@cwnu.edu.cnx (X. Yang), r.zhang@uq.edu.au (R. Zhang)

14 **Table S1.** Comparison of Kinetic parameters ( $K_m$  and  $V_{max}$ ).

| Catalyst                                       | Substrate                     | $V_{max}(10^{-8}M \cdot s^{-1})$ | $K_m(mM)$ | Ref.      |
|------------------------------------------------|-------------------------------|----------------------------------|-----------|-----------|
| $\alpha$ -Fe <sub>2</sub> O <sub>3</sub> @CoNi | TMB                           | 13.5                             | 0.23      | This work |
|                                                | H <sub>2</sub> O <sub>2</sub> | 9.3                              | 0.42      |           |
| Fe SSN                                         | TMB                           | 20.4                             | 0.53      | [1]       |
|                                                | H <sub>2</sub> O <sub>2</sub> | 13.2                             | 0.36      |           |
| CDs@ZIF-8-a                                    | TMB                           | 1.95                             | 0.232     | [2]       |
|                                                | H <sub>2</sub> O <sub>2</sub> | 1.22                             | 0.737     |           |
| CB-CQDs                                        | TMB                           | 5.13                             | 0.83      | [3]       |
|                                                | H <sub>2</sub> O <sub>2</sub> | 4.09                             | 0.70      |           |
| Co <sub>9</sub> S <sub>8</sub>                 | TMB                           | 99                               | 1.64      | [4]       |
|                                                | H <sub>2</sub> O <sub>2</sub> | 35                               | 7.39      |           |
| Por-NiCo <sub>2</sub> S <sub>4</sub>           | TMB                           | 34.86                            | 0.3       | [5]       |
|                                                | H <sub>2</sub> O <sub>2</sub> | 4.32                             | 4.5       |           |
| HRP                                            | TMB                           | 10                               | 0.43      | [6]       |
|                                                | H <sub>2</sub> O <sub>2</sub> | 8.71                             | 3.70      |           |

15

17 **Table S2.** Comparison of the proposed method with other methods for the detection of HQ.

| No. | Method       | Materials                                      | Linear Rang( $\mu\text{M}$ ) | LOD( $\mu\text{M}$ ) | Ref.      |
|-----|--------------|------------------------------------------------|------------------------------|----------------------|-----------|
| 1   | Colorimetry  | Pt/CdS                                         | 1.0-10                       | 0.165                | [7]       |
| 2   | Colorimetry  | ZnO/ZnFe <sub>2</sub> O <sub>4</sub>           | 0-150                        | 3.75                 | [6]       |
| 3   | Colorimetry  | NiCo <sub>2</sub> O <sub>4</sub>               | 5-110                        | 2.70                 | [8]       |
| 4   | Fluorescence | SiQDs                                          | 6-100                        | 2.63                 | [9]       |
| 5   | Fluorescence | g-CNQDs                                        | 0.5-11.6                     | 0.04                 | [10]      |
| 6   | Fluorescence | N/S/P-codoped CDs                              | 0.56-375                     | 0.16                 | [11]      |
| 7   | ECL          | MOF-rGO                                        | 10-200                       | 0.66                 | [12]      |
| 8   | ECL          | CoTFPP/GO/GCE                                  | 1-200                        | 0.21                 | [13]      |
| 9   | ECL          | CoFe <sub>2</sub> Se <sub>4</sub> /PCF         | 0.5-200                      | 0.13                 | [14]      |
| 10  | Colorimetry  | $\alpha$ -Fe <sub>2</sub> O <sub>3</sub> @CoNi | 0.5-30                       | 0.16                 | This work |

18

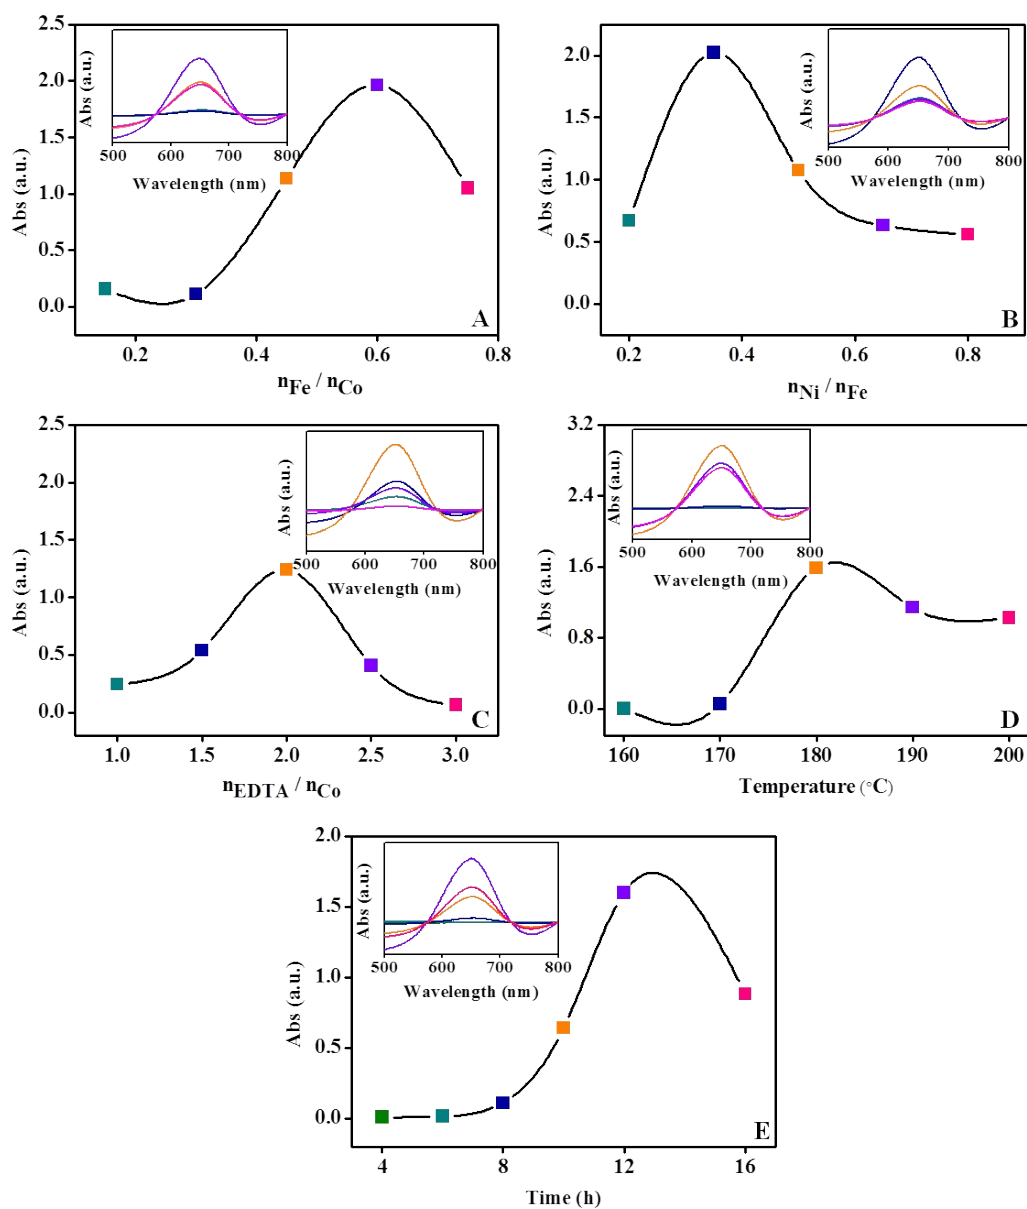

19 **Fig. S1** Optimization of Co, Ni and EDTA dosage (A, B, C), synthesis temperature and  
 20 time (D and E), (inset) the oxTMB of corresponding absorption spectra.

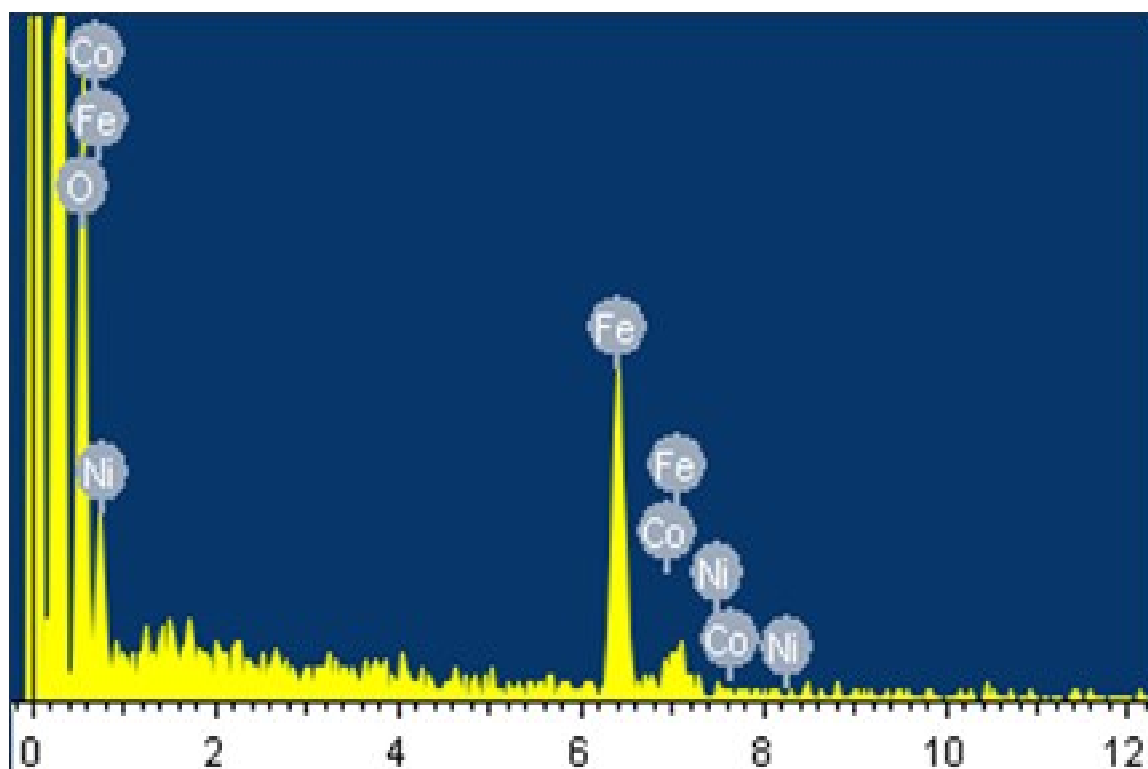

21 Fig. S2 Energy dispersive spectrometer (EDS) image of  $\alpha$ -Fe<sub>2</sub>O<sub>3</sub>@CoNi.

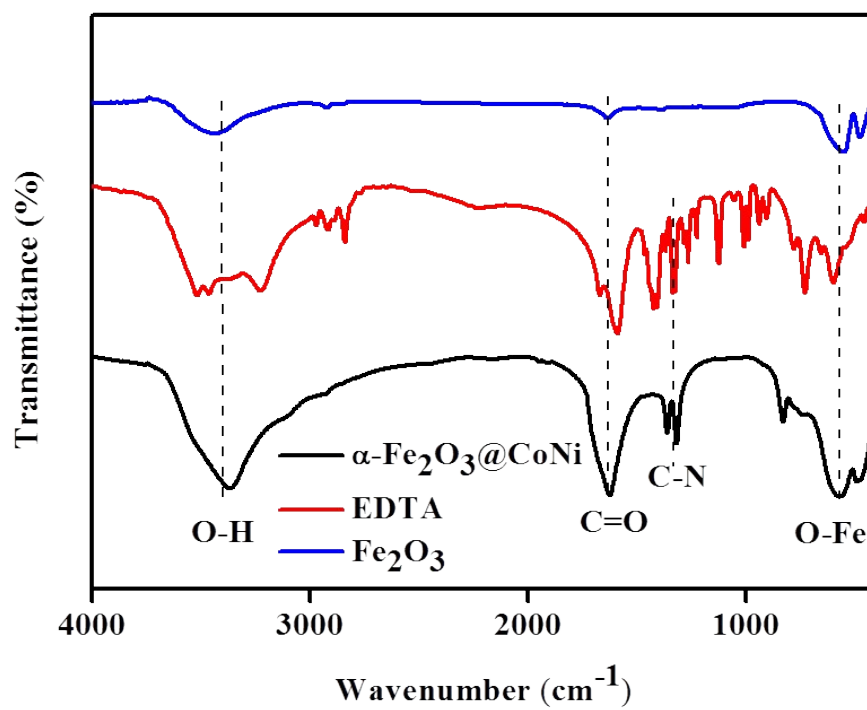

22 **Fig. S3** The FT-IR spectra of  $\alpha\text{-Fe}_2\text{O}_3\text{@CoNi}$ , commercial  $\text{Fe}_2\text{O}_3$  and EDTA.

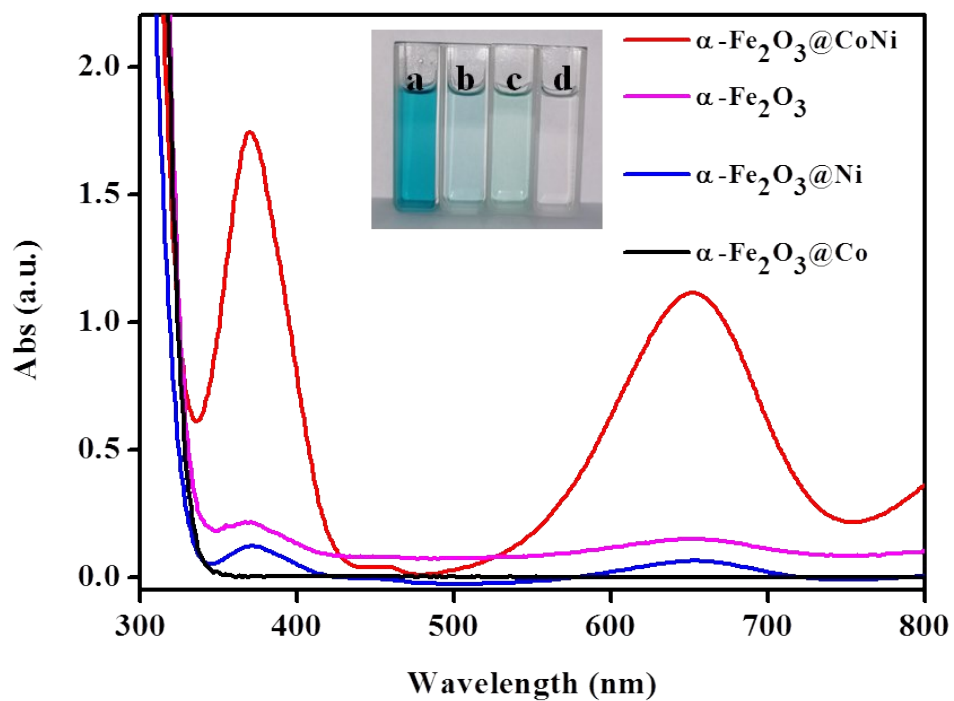

23 **Fig. S4** The UV-vis absorption spectrum of commercial Fe<sub>2</sub>O<sub>3</sub>,  $\alpha$ -Fe<sub>2</sub>O<sub>3</sub>@Co,  $\alpha$ -  
 24 Fe<sub>2</sub>O<sub>3</sub>@Ni and  $\alpha$ -Fe<sub>2</sub>O<sub>3</sub>@CoNi in TMB/H<sub>2</sub>O<sub>2</sub> system. (inset) The color of  
 25 corresponding solutions. (a) TMB+H<sub>2</sub>O<sub>2</sub>+ $\alpha$ -Fe<sub>2</sub>O<sub>3</sub>@CoNi, (b) TMB+H<sub>2</sub>O<sub>2</sub>+Fe<sub>2</sub>O<sub>3</sub> (c)  
 26 TMB+H<sub>2</sub>O<sub>2</sub>+ $\alpha$ -Fe<sub>2</sub>O<sub>3</sub>@Ni, (c) TMB+H<sub>2</sub>O<sub>2</sub>+ $\alpha$ -Fe<sub>2</sub>O<sub>3</sub>@Co.

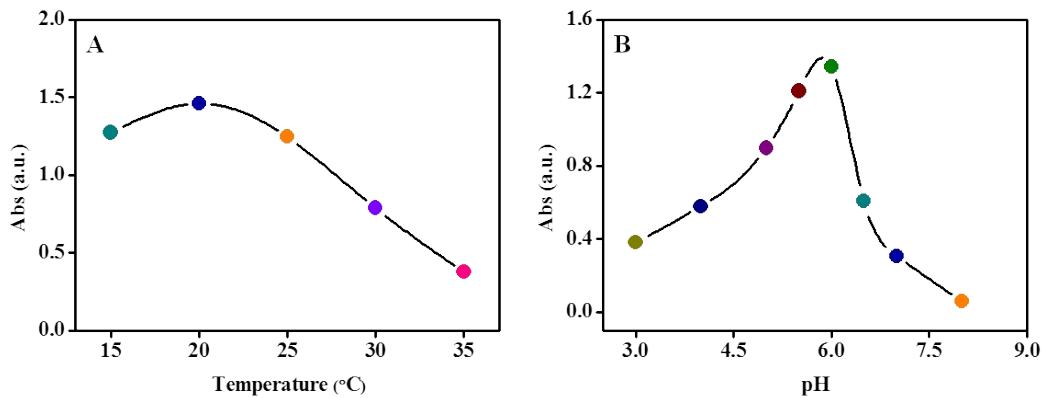

28 **Fig. S5** Effects of temperature (A) and pH (B) on the catalytic activity of  $\alpha$ -  
29 Fe<sub>2</sub>O<sub>3</sub>@CoNi.



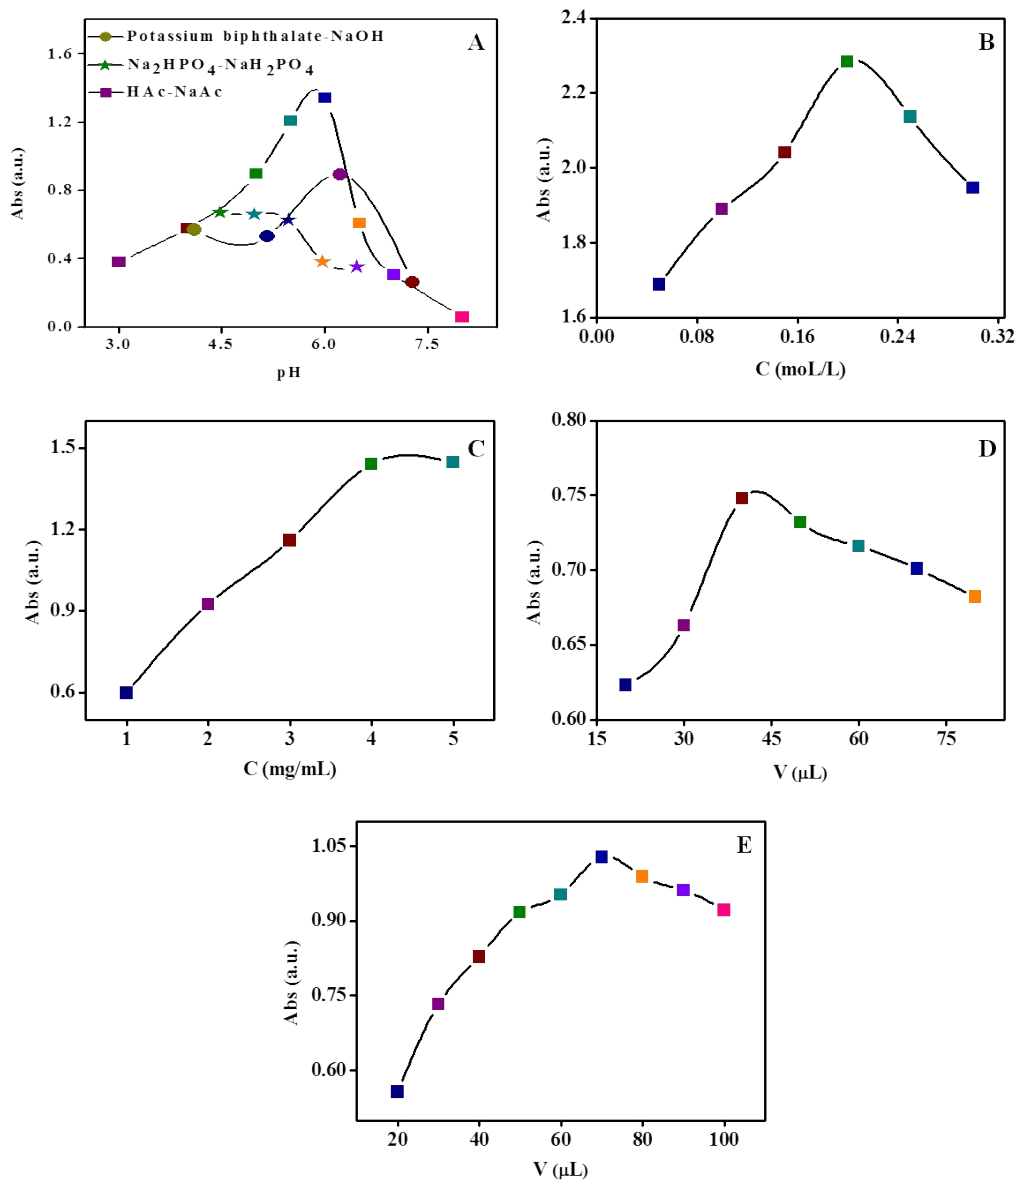

31 **Fig. S6** Effects of type and concentration of buffer solution (A, B), concentration of  $\alpha$ -  
 32  $\text{Fe}_2\text{O}_3@\text{CoNi}$  (C), dosage of TMB (D) and  $\text{H}_2\text{O}_2$  (E) on the catalytic activity of  $\alpha$ -  
 33  $\text{Fe}_2\text{O}_3@\text{CoNi}$ .

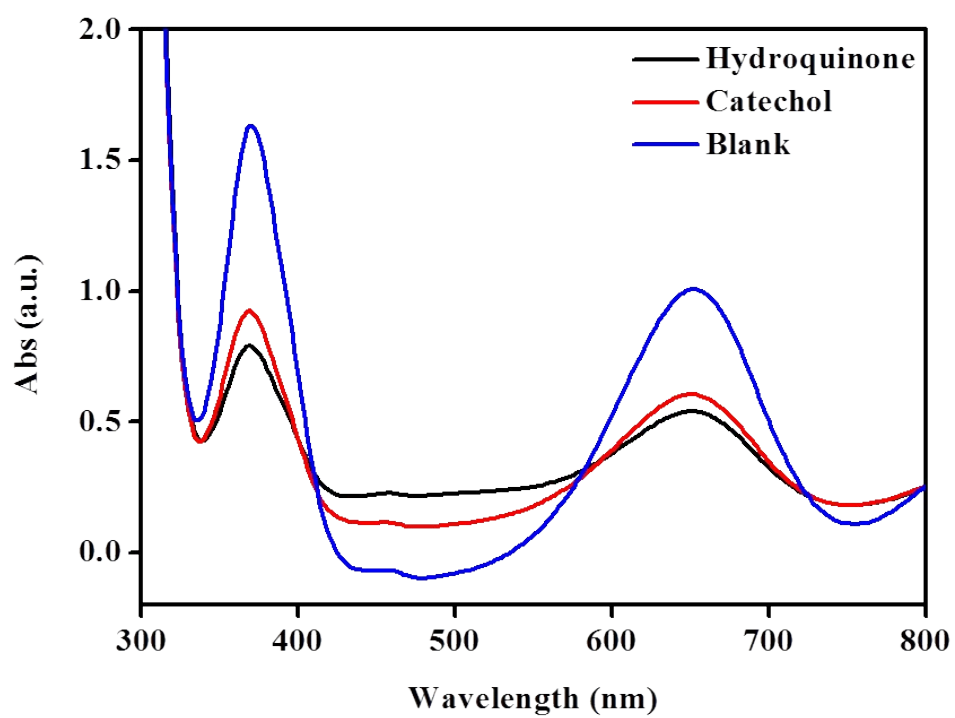

35 **Fig. S7** The UV-vis absorption spectrum of hydroquinone (30  $\mu\text{M}$ ) and Catechol (30  
36  $\mu\text{M}$ ) in  $\alpha\text{-Fe}_2\text{O}_3\text{@CoNi/TMB/H}_2\text{O}_2$  system and blank control.

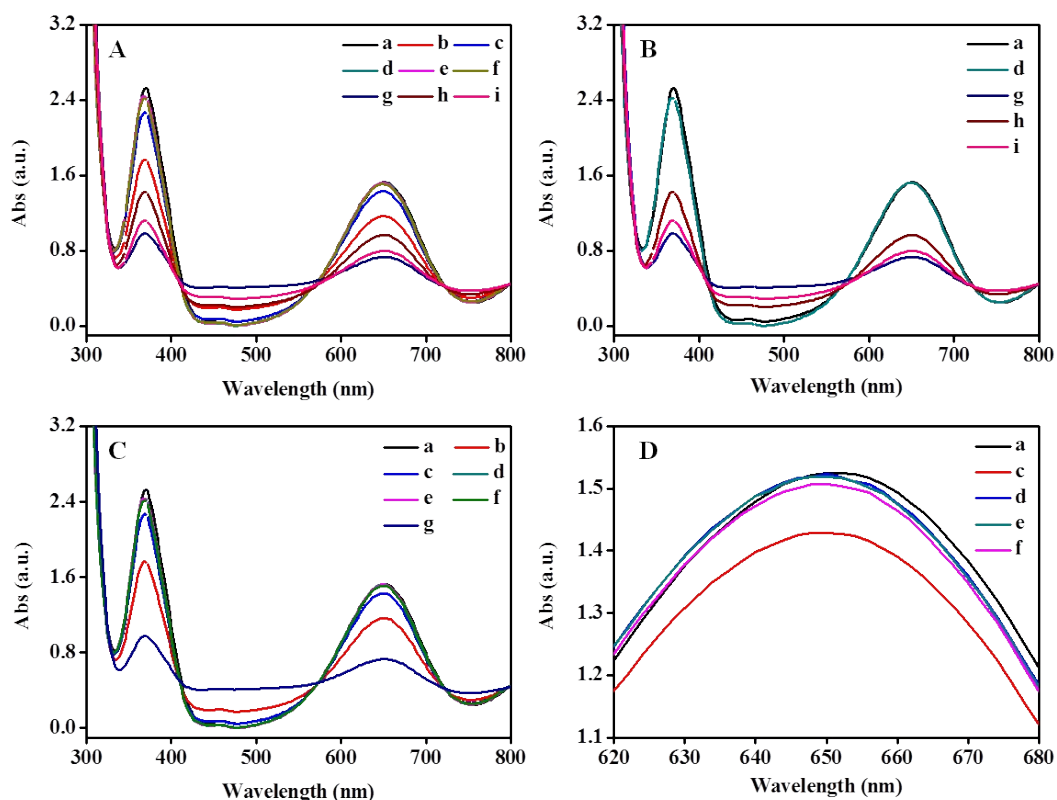

38 **Fig. S8** The UV-vis absorption spectrum of TMB+H<sub>2</sub>O<sub>2</sub>+α-Fe<sub>2</sub>O<sub>3</sub>@CoNi system with  
 39 different alumina additions (a, blank; b-f, 0.1-0.5g alumina added into 2 mL 0.006 M  
 40 HQ solution; g, catechol solution before alumina treatment; h-i, HQ solution before  
 41 and after alumina treatment, respectively).

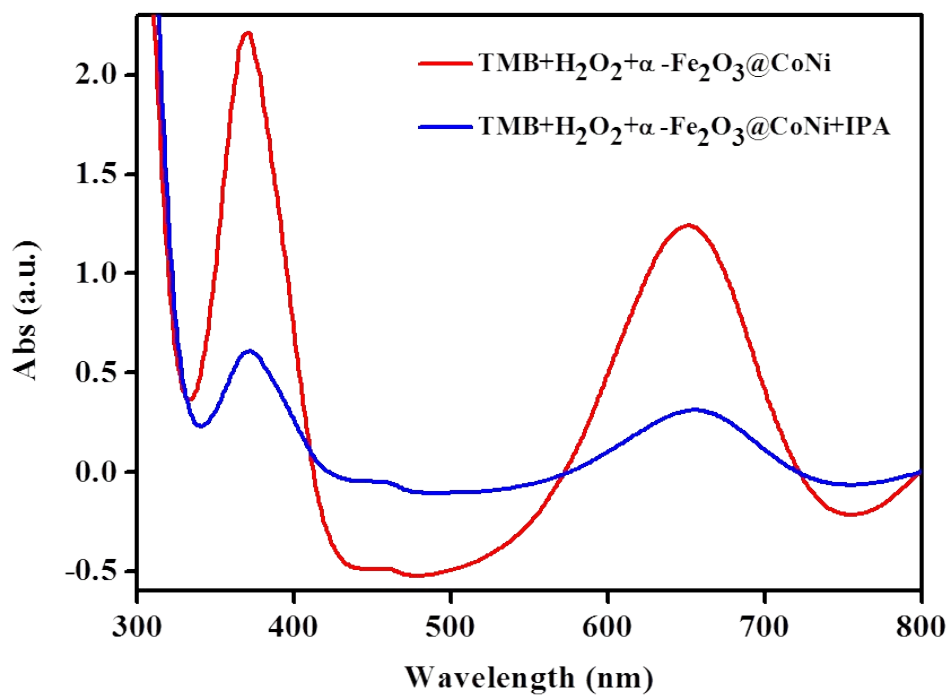

43 **Fig. S9** The effect of isopropyl alcohol (IPA) on the catalytic activity of  $\alpha$ -Fe<sub>2</sub>O<sub>3</sub>@CoNi.

## 45 References

- 46 [1] M. Chen, H. Zhou, X. Liu, T. Yuan, W. Wang, C. Zhao, Y. Zhao, F. Zhou, X. Wang,  
47 Z. Xue, T. Yao, C. Xiong, Y. Wu, Single iron site nanozyme for ultrasensitive  
48 glucose detection, *Small*. 16(2020) 2002343-2002348.
- 49 [2] Y. Wang, X. Liu, M. Wang, X. Wang, W. Ma, J. Li, Facile synthesis of CDs@ZIF-8  
50 nanocomposites as excellent peroxidase mimics for colorimetric detection of  
51 H<sub>2</sub>O<sub>2</sub> and glutathione, *Sens. Actuators, B*. 329(2021) 129115-129123.
- 52 [3] C. Yuan, X. Qin, Y. Xu, X. Li, Y. Chen, R. Shi, Y. Wang, Carbon quantum dots  
53 originated from chicken blood as peroxidase mimics for colorimetric detection  
54 of biothiols, *J. Photoch Photobio A: Chem*. 396(2020) 112529-112535.
- 55 [4] J. Mu, J. Li, X. Zhao, E.-C. Yang, X.-J. Zhao, Novel urchin-like Co<sub>9</sub>S<sub>8</sub> nanomaterials  
56 with efficient intrinsic peroxidase-like activity for colorimetric sensing of copper  
57 (II) ion, *Sens. Actuators, B*. 258(2018) 32-41.
- 58 [5] Y. He, N. Li, W. Li, X. Zhang, X. Zhang, Z. Liu, Q. Liu, 5,10,15,20-tetrakis (4-  
59 carboxylphenyl) porphyrin functionalized NiCo<sub>2</sub>S<sub>4</sub> yolk-shell nanospheres:  
60 Excellent peroxidase-like activity, catalytic mechanism and fast cascade  
61 colorimetric biosensor for cholesterol, *Sens. Actuators, B*. 326(2021) 128850-  
62 128860.
- 63 [6] X. Wang, M. Zhao, Y. Song, Q. Liu, Y. Zhang, Y. Zhuang, S. Chen, Synthesis of  
64 ZnFe<sub>2</sub>O<sub>4</sub>/ZnO heterostructures decorated three-dimensional graphene foam as  
65 peroxidase mimetics for colorimetric assay of hydroquinone, *Sens. Actuators, B*.  
66 283(2019) 130-137.
- 67 [7] X. Zhao, H. Lyu, X. Yao, C. Xu, Q. Liu, Z. Liu, X. Zhang, X. Zhang, Hydroquinone  
68 colorimetric sensing based on platinum deposited on CdS nanorods as  
69 peroxidase mimics, *Microchim. Acta*. 187(2020) 587-596.
- 70 [8] Y. Song, M. Zhao, H. Li, X. Wang, Y. Cheng, L. Ding, S. Fan, S. Chen, Facile  
71 preparation of urchin-like NiCo<sub>2</sub>O<sub>4</sub> microspheres as oxidase mimetic for  
72 colormetric assay of hydroquinone, *Sens. Actuators, B*. 255(2018) 1927-1936.
- 73 [9] Y. Liu, Q. Wang, S. Guo, P. Jia, Y. Shui, S. Yao, C. Huang, M. Zhang, L. Wang,  
74 Highly selective and sensitive fluorescence detection of hydroquinone using  
75 novel silicon quantum dots, *Sens. Actuators, B*. 275(2018) 415-421.
- 76 [10] J. Chen, Y. Gao, X. Hu, Y. Xu, X. Lu, Detection of hydroquinone with a novel  
77 fluorescence probe based on the enzymatic reaction of graphite phase carbon  
78 nitride quantum dots, *Talanta*. 194(2019) 493-500.

- 79 [11] Y. Wang, Q. Yue, L. Tao, C. Zhang, C.Z. Li, Fluorometric determination of  
80 hydroquinone by using blue emitting N/S/P-codoped carbon dots, *Microchim.*  
81 *Acta.* 185(2018) 550-558.
- 82 [12] H. Wang, Q. Hu, Y. Meng, Z. Jin, Z. Fang, Q. Fu, W. Gao, L. Xu, Y. Song, F. Lu,  
83 Efficient detection of hazardous catechol and hydroquinone with MOF-rGO  
84 modified carbon paste electrode, *J. Hazard. Mater.* 353(2018) 151-157.
- 85 [13] D.L. Huang, J. Wang, F. Cheng, A. Ali, H.S. Guo, X. Ying, L.P. Si, H.Y. Liu,  
86 Synergistic effect of a cobalt fluoroporphyrin and graphene oxide on the  
87 simultaneous voltammetric determination of catechol and hydroquinone,  
88 *Microchim. Acta.* 186(2019) 381-391.
- 89 [14] D. Yin, J. Liu, X. Bo, L. Guo, Cobalt-iron selenides embedded in porous carbon  
90 nanofibers for simultaneous electrochemical detection of trace of  
91 hydroquinone, catechol and resorcinol, *Anal. Chim. Acta.* 1093(2020) 35-42.
- 92
